# Supplementary figures and images for: PEG-associated efficacy loss in lipid nanoparticles persists across formulation modifications for mRNA delivery
Source: Research Square preprint supplement (doi:10.21203/rs.3.rs-9763025/v1), 2026-06-09

**Graphical Abstract**

**
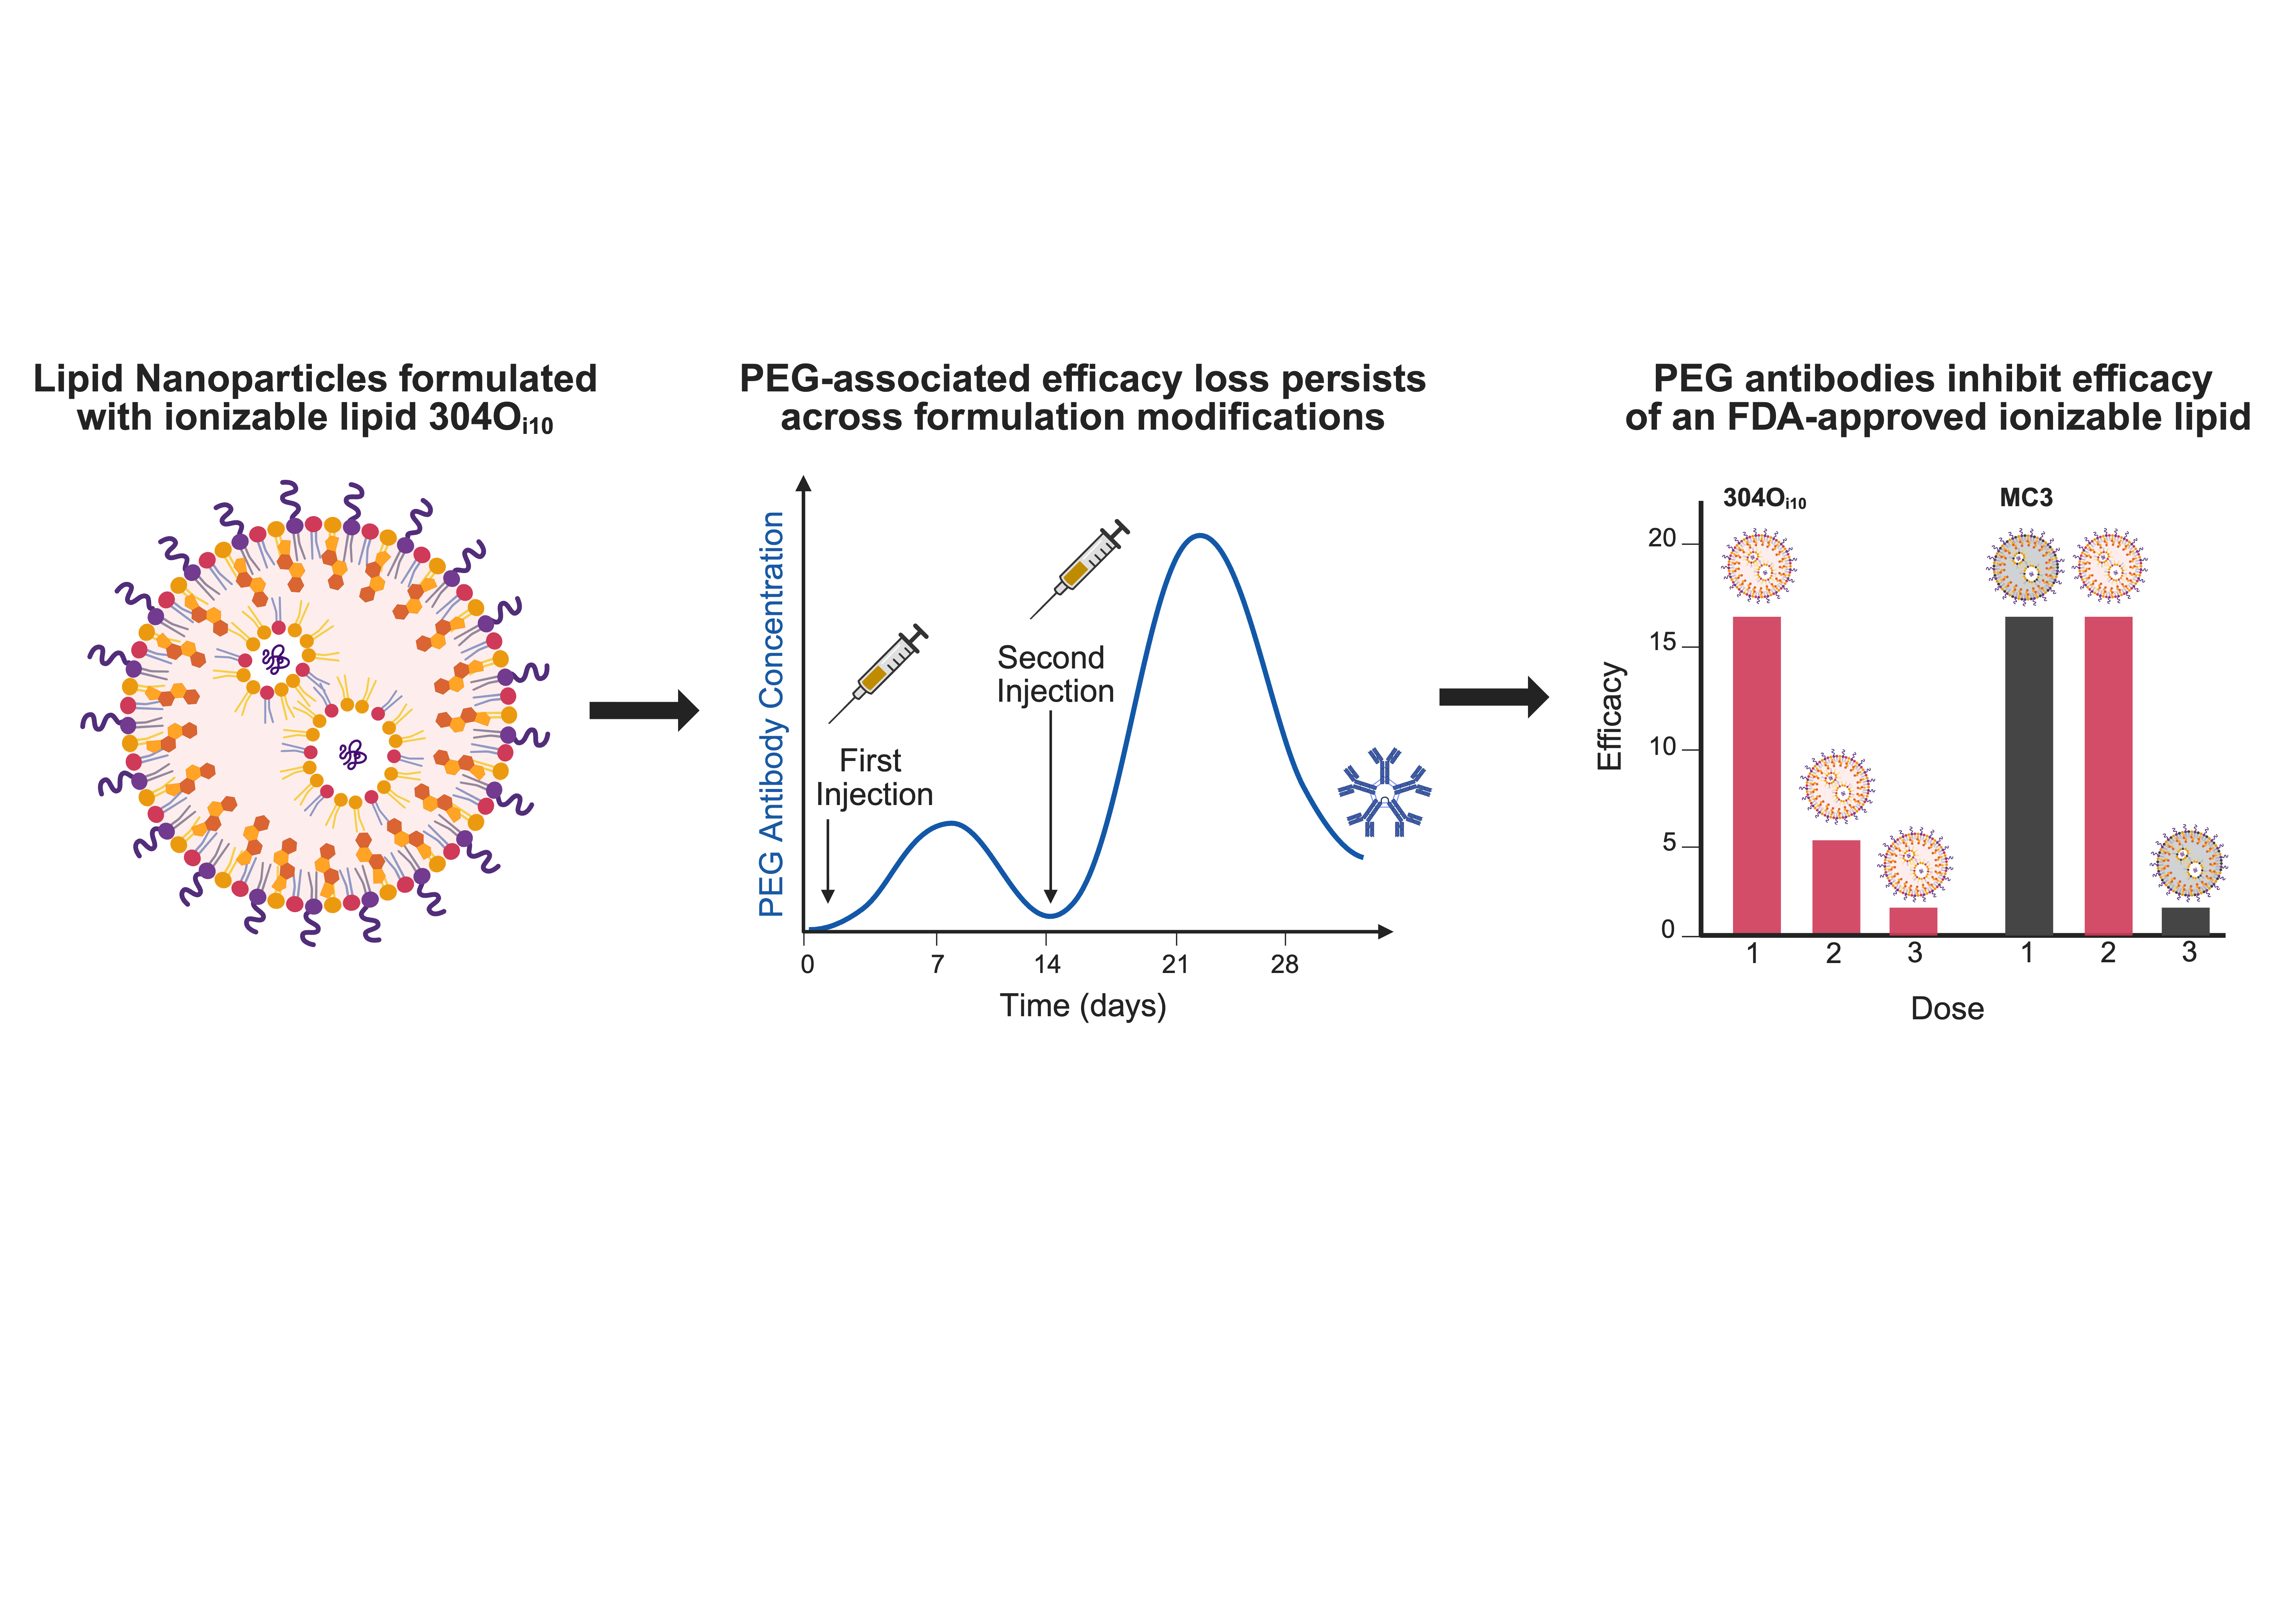
**

Supplement: Supplementary file 2 [file 7384940a14e58b7fbe6c0de3.docx]
